# Supplementary material for: Promoting electrocatalytic nitrogen reduction to ammonia via Fe-boosted nitrogen activation on MnO2 surfaces
Source: Royal Society of Chemistry journal article supplement (doi:10.1039/c9ta13026h), 2020-01-01
Supplement: c9ta13026h1.pdf [file c9ta13026h1.pdf]

**Promoting electrocatalytic nitrogen reduction to ammonia via Fe-boosting nitrogen  
activation on MnO<sub>2</sub> surfaces**

Ting Huang,<sup>a,1</sup> Zaichun Liu,<sup>b,1</sup> Yu Zhang,<sup>a</sup> Faxing Wang,<sup>c</sup> Juan Wen,<sup>b</sup> Chengyin Wang,<sup>d</sup> Masud

Hossain,<sup>b</sup> Qingji Xie,<sup>a,\*</sup> Shouzhuo Yao,<sup>a,\*</sup> Yuping Wu<sup>b,\*</sup>

<sup>a</sup> Key Laboratory of Chemical Biology & Traditional Chinese Medicine Research (Ministry of Education of China), College of Chemistry and Chemical Engineering, Hunan Normal University, Changsha 410081, Hunan, China

<sup>b</sup> School of Energy Science and Engineering & Institute of Advanced Materials, Nanjing Tech University, Nanjing 211816, Jiangsu Province, China

<sup>c</sup> Department of Chemistry and Food Chemistry & Center for Advancing Electronics Dresden (cfaed), Technische Universität Dresden, 01062, Dresden, German

<sup>d</sup> College of Chemistry & Chemical Engineering, Yangzhou University, Yangzhou 225127, Jiangsu Province, China

Electronic supporting information (ESI):

## Material

KMnO<sub>4</sub>, sodium salicylate (C<sub>7</sub>H<sub>5</sub>O<sub>3</sub>Na), sodium hypochlorite (NaClO), Na<sub>2</sub>[Fe(CN)<sub>5</sub>NO]·2H<sub>2</sub>O, ethanol were purchased from Macklin Biochemical Co., Ltd (Shanghai, China). Sodium sulfate, iron nitrate, sodium hydroxide, potassium chloride were purchased from Sinopharm Chemical Reagent Co., Ltd (Shanghai, China). The ultrapure water used throughout all experiments was purified through a Millipore system.

## Ammonia detection

- 1) Oxidizing agent: 0.75 M NaOH and NaClO (4.5%, Active chlorine).
- 2) Coloring agent: 0.32 M NaOH and 0.4 M C<sub>7</sub>H<sub>5</sub>O<sub>3</sub>Na.
- 3) Catalyst agent: 1 g Na<sub>2</sub>Fe(CN)<sub>5</sub>NO·2H<sub>2</sub>O diluted to 10 mL with deionized water.
- 4) Standard solution: NH<sub>4</sub>Cl with a series of concentrations.

Concentration of produced NH<sub>3</sub> was determined by UV-vis absorption spectra with indophenol blue.<sup>1</sup> Specifically, 4 mL of the electrolyte was taken from the cathode chamber. Then 50 μL of oxidizing agent, 500 μL of coloring agent and 50 μL of catalyst agent were added into the above electrolyte in turn. After standing at room temperature for 2 h in dark, the absorption spectra of the resulting solution were measured with an ultraviolet-visible (UV-vis) spectrophotometer. The formed indophenol blue was determined by absorbance at 660 nm. The concentration-absorbance curves were calibrated using standard NH<sub>4</sub>Cl solution with NH<sub>3</sub> concentrations of 0.0, 0.05, 0.1, 0.15, 0.2, 0.25, 0.3, 0.4, 0.5, 0.6, 0.7, 0.8, 0.9, 1.0 μg mL<sup>-1</sup> in 0.1 M Na<sub>2</sub>SO<sub>4</sub>. The fitting curve ( $y = 0.4409x + 0.0539$ ,  $R^2 = 0.999$ ) indicates good linear relation of absorbance value with NH<sub>3</sub> concentration by three times independent calibrations.

## Hydrazine detection

The amount of hydrazine in electrolyte was measured by the method of Watt and Chrisp.<sup>2</sup> In detail, 5 mL of the electrolyte solution was taken out and then mixed with 5 mL of the coloring solution (a mixture of 5.99 g para-(dimethylamino) benzaldehyde, 30 mL concentrated HCl and 300 mL ethanol). The absorbance of resulting solution was measured at a wavelength of 455 nm. The concentration-absorbance curves were calibrated using standard N<sub>2</sub>H<sub>4</sub>·H<sub>2</sub>O solution in a series of concentrations. The fitting curve ( $y = 0.8949x + 0.01$ ,  $R^2 = 0.9998$ ) shows a good

linear relation between absorbance with N<sub>2</sub>H<sub>4</sub> concentration in three independent calibrations.

### Determination of NH<sub>3</sub> yield and FE

The Faradaic efficiency for N<sub>2</sub> reduction was defined as the amount of electric charge used for synthesizing NH<sub>3</sub> divided the total charge passed through the electrodes during the electrolysis. The total amount of NH<sub>3</sub> produced was measured using colorimetric methods. Assuming three electrons were needed to produce one NH<sub>3</sub> molecule, the FE could be calculated as follows

$$FE = 3 \times F \times C_{\text{NH}_3} \times V / (17 \times Q) \times 100\% \quad (\text{S1})$$

The  $v_{\text{NH}_3}$  was calculated using the following equation

$$v_{\text{NH}_3} = C_{\text{NH}_3} \times V / (m_{\text{cat.}} \times t) \text{ or } v_{\text{NH}_3} = C_{\text{NH}_3} \times V / (17 \times A \times t) \quad (\text{S2})$$

where  $F$  is the Faraday constant,  $C_{\text{NH}_3}$  is the measured molar concentration of NH<sub>4</sub><sup>+</sup>,  $V$  is the electrolyte volume,  $Q$  is the total quantity of applied electricity,  $m$  is the mass of the catalyst or active component,  $t$  is the reaction time, and  $A$  is the geometric area.

### Computational Details

First-principles calculations were performed with the generalized gradient approximation (GGA)<sup>3</sup> in the form of the Perdew, Burke, and Ernzerhof (PBE)<sup>4</sup> exchange-correlation functional, as implemented in the Dmol<sup>3</sup> package.<sup>5</sup> An eight atom layers MnO<sub>2</sub> (211) surface was modeled for Fe-substitution with 20 Å vacuum space to avoid the interaction from nearby layers. Layers 5 to 8 are central layers and 1 to 4 are surface layers. One Mn atom from the surface of MnO<sub>2</sub> (211) was replaced by a Fe atom, named as Fe-MnO<sub>2</sub>. Structural relaxation was performed until the convergence criteria for energy were set to be 10<sup>-5</sup> eV, and 0.002 Ha Å<sup>-1</sup> was adopted for the total energy calculations. The Brillouin zone integration was performed with 2 × 2 × 1  $\Gamma$ -centred Monkhorst-Pack k-point meshes in geometry optimization. The N<sub>2</sub> adsorption energy is defined as:

$$E_{\text{ads}} = E_{\text{N}_2/\text{substrate}} - E_{\text{substrate}} - E_{\text{N}_2} \quad (\text{S3})$$

After the geometry optimization, frequencies of each complex were calculated and the free energy was obtained as follows:

$$\Delta G = \Delta E + \Delta ZPE - T\Delta S + \Delta G_u + \Delta G_{pH} \quad (S4)$$

where  $\Delta E$ ,  $\Delta ZPE$  and  $\Delta S$  represent the change in calculated total energy, zero-point energy and entropy between the products and reactants, respectively.  $T$  represents the temperature (298.15 K).  $\Delta G_u = -neU$ , where  $n$  represents the number of transferred charge, and  $U$  represents the electrode potential with respect to the normal hydrogen electrode.  $\Delta G_{pH}$  represents the correction  $H^+$  free energy by the concentration, which can be calculated through  $\Delta G_{pH} = 0.059 \times pH$  (the value of  $pH$  is assumed to be zero in this work).

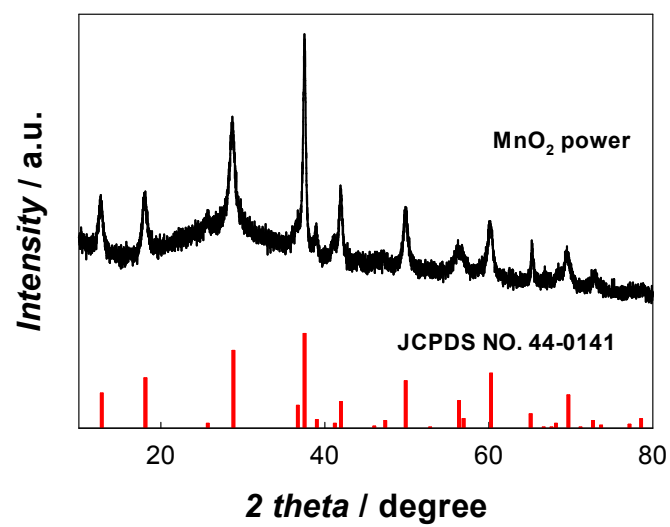

**Fig. S1** XRD patterns of MnO<sub>2</sub>.

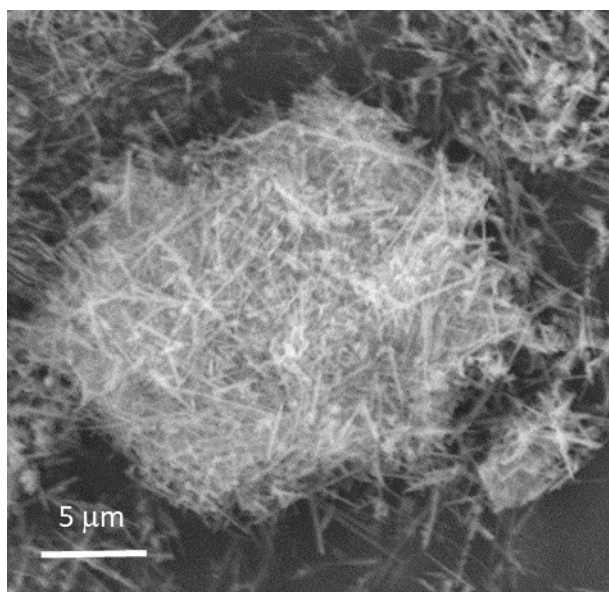

**Fig. S2** SEM image of  $\text{MnO}_2$ .

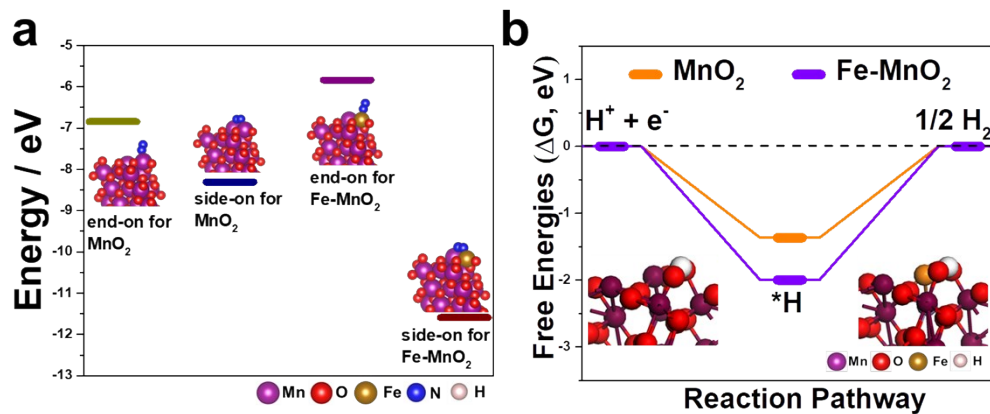

**Fig. S3** (a) DFT-calculated adsorption energies of  $N_2$  adsorption on (211) surface of  $MnO_2$  and  $Fe-MnO_2$  for side-on and end-on configurations. (b) DFT-calculated free energy pathways of HER on (211) surface of  $MnO_2$  and  $Fe-MnO_2$  at surface potential of 0 V under 298.15 K. Insets are the corresponding optimized atomic structures.

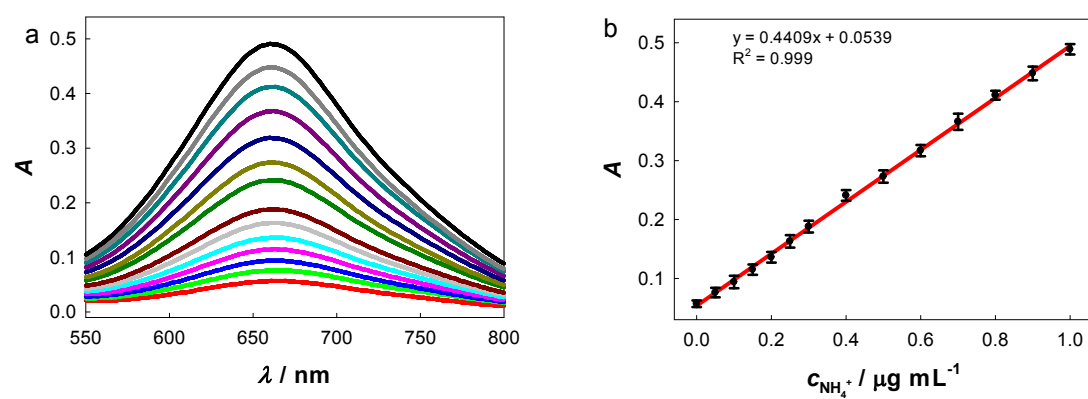

**Fig. S4** (a) UV-Vis spectra of various  $\text{NH}_4^+$  concentrations (mother solution: 0.1 M  $\text{Na}_2\text{SO}_4$ ) after incubated for 2 h at room temperature. (b) Calibration curve used for calculation of  $\text{NH}_3$  concentrations.



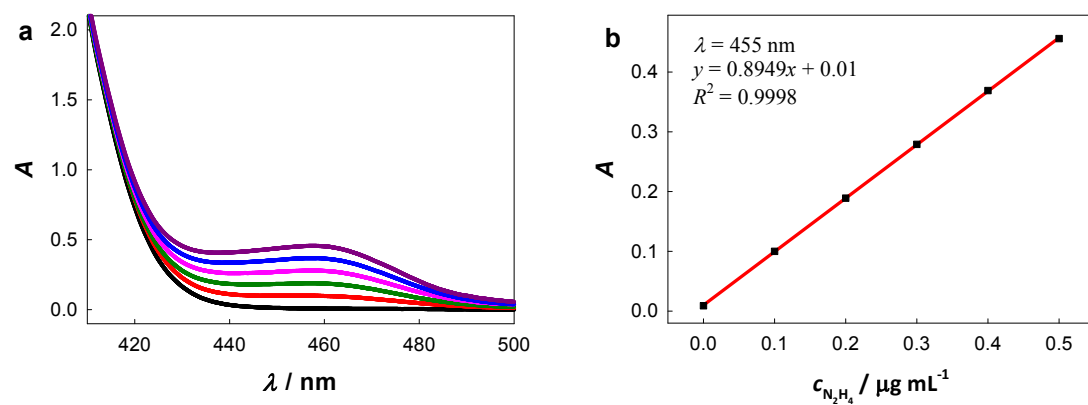

**Fig. S5** (a) UV-Vis absorption spectra of various  $\text{N}_2\text{H}_4$  concentrations after incubated for 30 min at room temperature. (b) Calibration curve used for estimation of  $\text{N}_2\text{H}_4$  concentration.

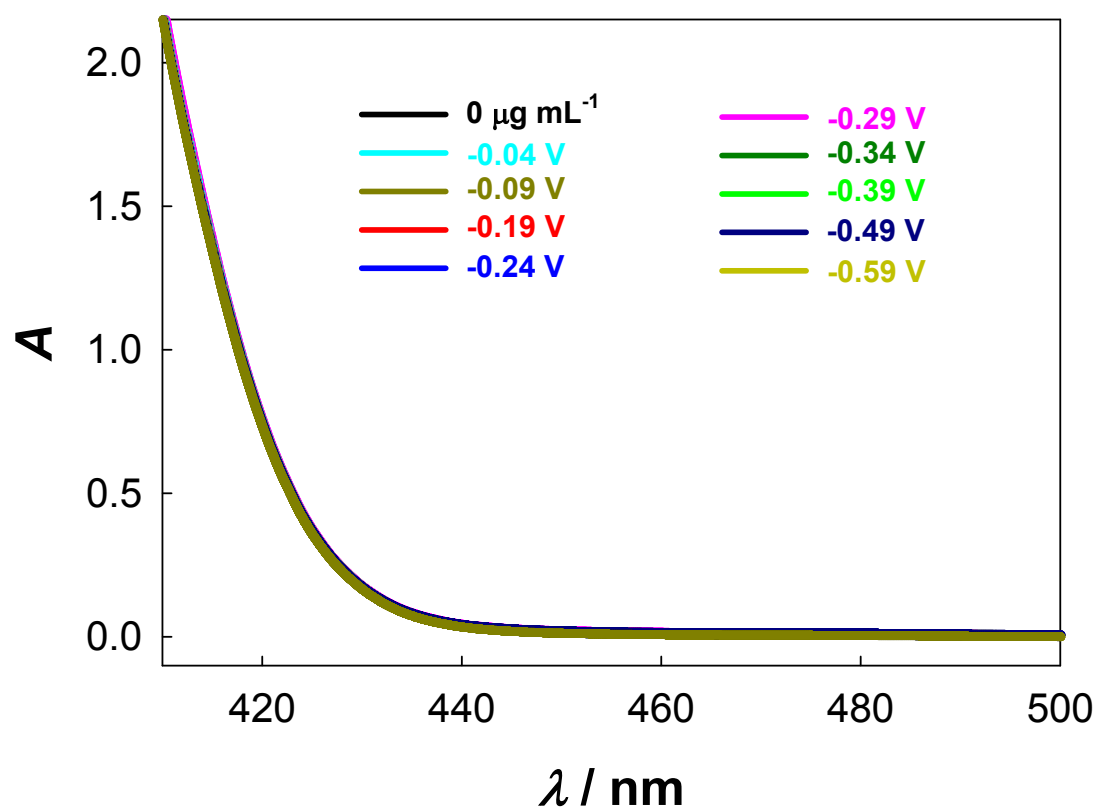

**Fig. S6** UV-Vis spectra of the electrolyte estimated by the method of Watt and Chrisp after 2 h electrolysis at a series of potentials under ambient conditions.

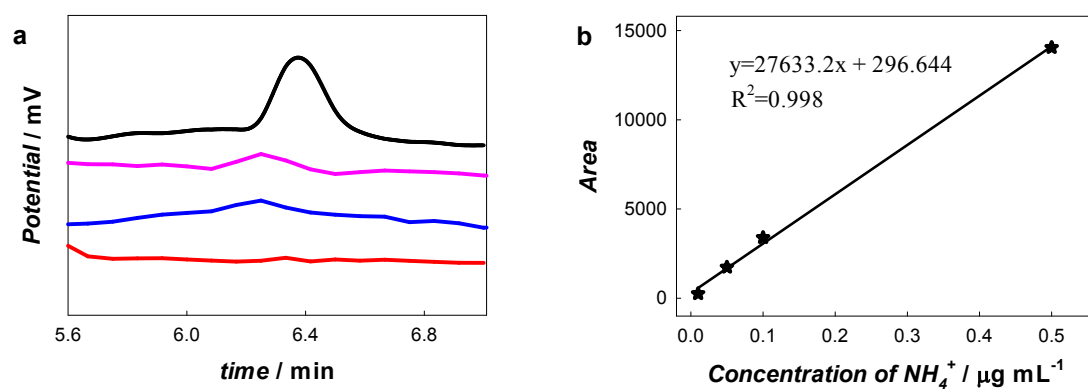

**Fig. S7** (a) Ion chromatogram spectra of the standard  $\text{NH}_4^+$  concentrations. (b) Calibration curve used for calculation of  $\text{NH}_4^+$  concentrations.

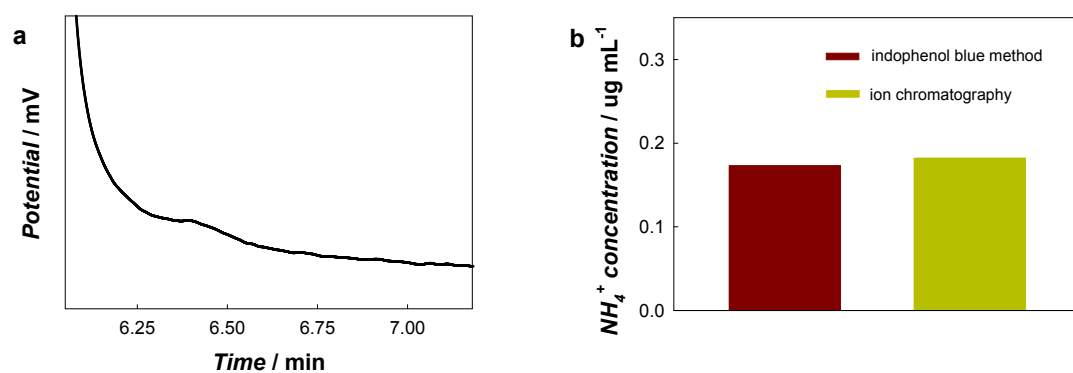

**Fig. S8** (a) Ion chromatograms for NRR with Fe–MnO<sub>2</sub> at -0.29 V after electrolysis. (b)  $\text{NH}_4^+$  concentration of Fe–MnO<sub>2</sub> at -0.29 V after 2 h electrolysis using ion chromatogram and indophenol blue method, respectively.

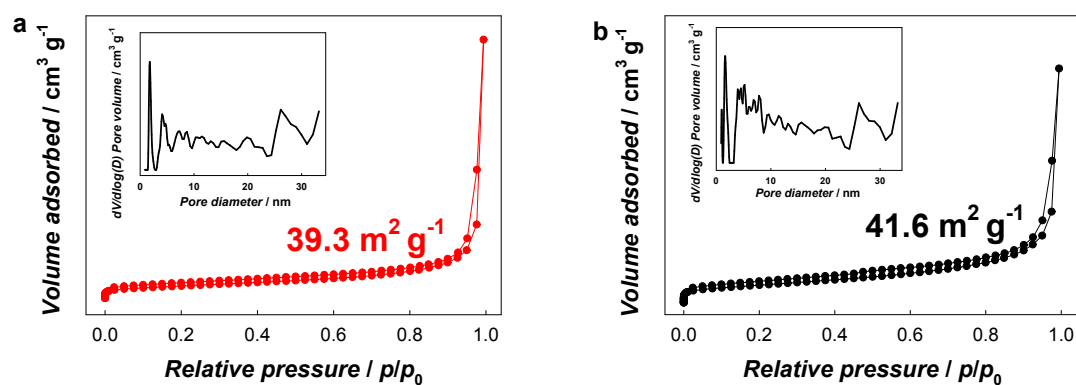

**Fig. S9** Nitrogen adsorption/desorption isotherm curves and their corresponding pore size distributions (inset) of (a) Fe-MnO<sub>2</sub> and (b) MnO<sub>2</sub>.

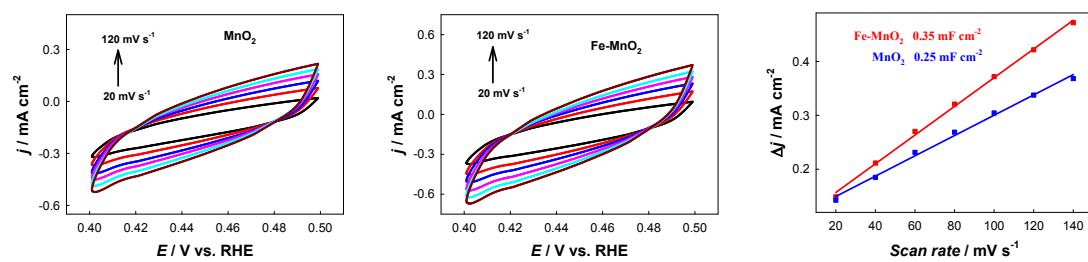

**Fig. S10.** CV curves (a) MnO<sub>2</sub>/CP and (b) Fe-MnO<sub>2</sub>/CP. (c) The capacitive currents at -0.45 V vs. RHE as a function of scan rates for MnO<sub>2</sub>/CP and Fe-MnO<sub>2</sub>/CP.

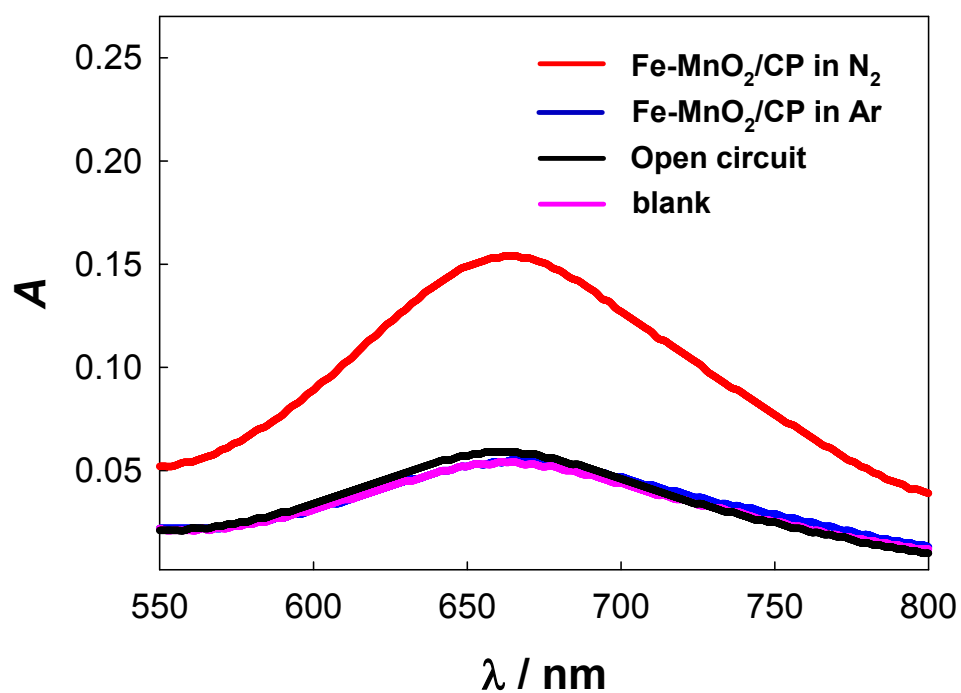

**Fig. S11** UV-Vis absorption spectra of the electrolytes stained with indophenol indicator after 2 h electrolysis under different conditions:  $-0.29$  V in N<sub>2</sub>-saturated electrolyte,  $-0.29$  V in Ar-saturated electrolyte, open circuit in N<sub>2</sub>-saturated electrolyte, and blank.

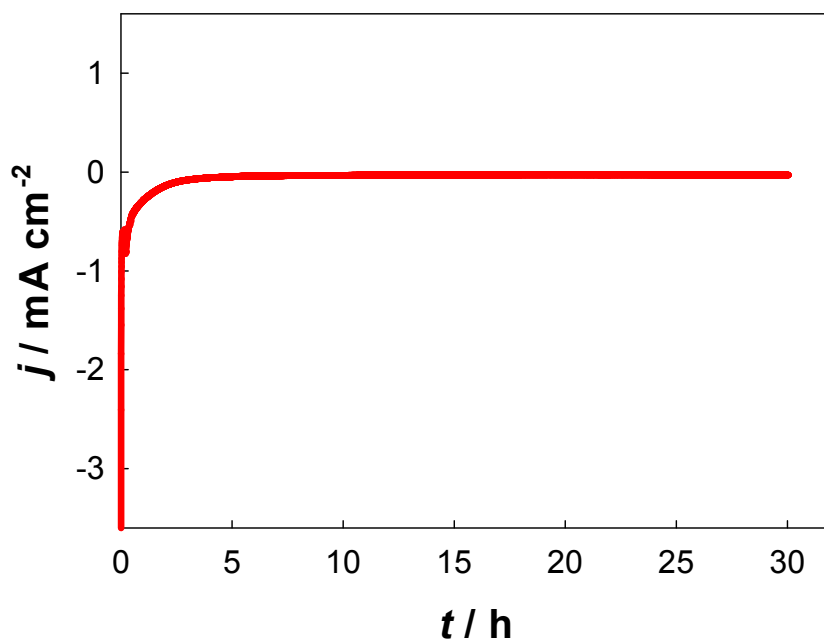

**Fig. S12** Chronoamperometry curve at -0.29 V using Fe-MnO<sub>2</sub>/CP catalyst (30 h).



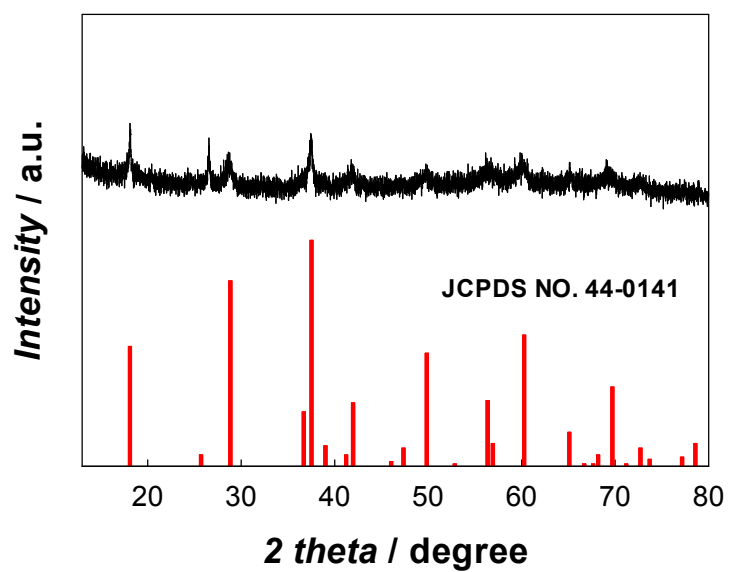

**Fig. S13** XRD patterns of Fe-MnO<sub>2</sub> after stability test in N<sub>2</sub>-saturated solution.

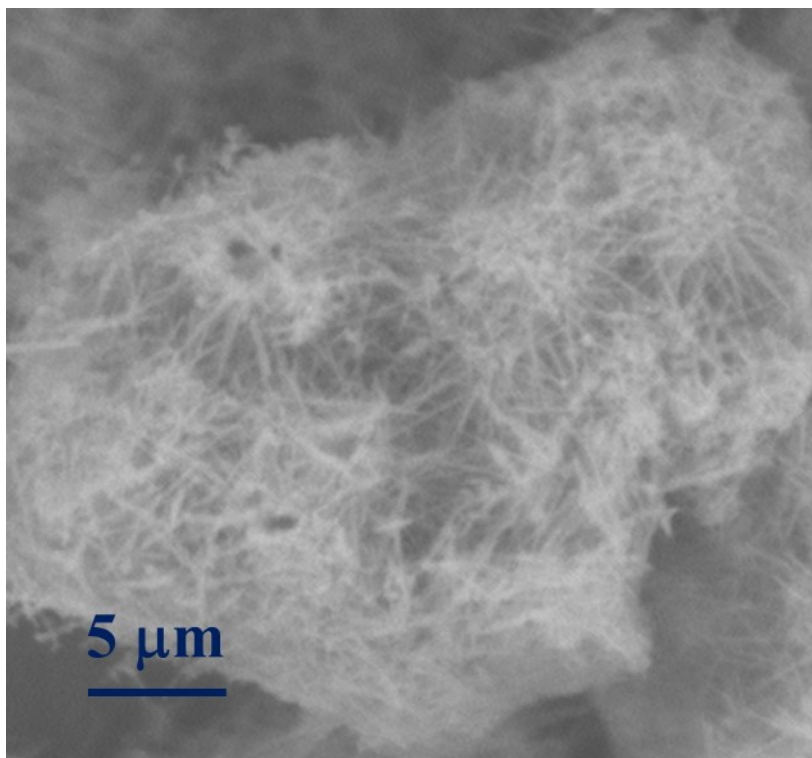

**Fig. S14** SEM image of Fe-MnO<sub>2</sub> after stability test in N<sub>2</sub>-saturated solution.

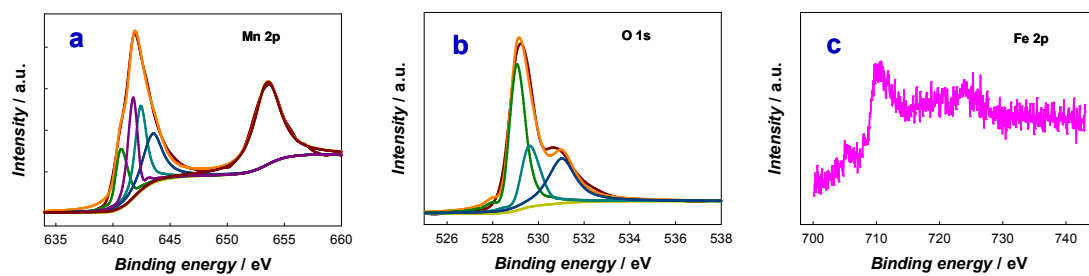

**Fig. S15** The XPS of Mn 2p (a), O 1s (b) and Fe 2p (c) regions for Fe-MnO<sub>2</sub> after stability test in N<sub>2</sub>-saturated solution. The XPS results in (a)-(c) also suggest that stability did not make much change on the chemical state of Mn, O and Fe.

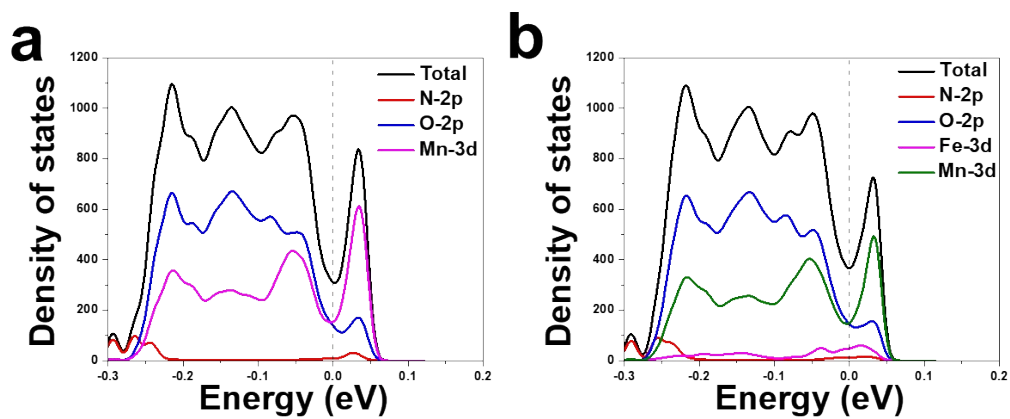

**Fig. S16** Density of states of the  $N_2$  adsorption on (211) surface of (a)  $MnO_2$  and (b)  $Fe-MnO_2$  for side-on configurations. The vertical dashed lines denote the Fermi energy.

**Table S1** ICP analysis of Fe in the electrolyte.

|                           |       |
|---------------------------|-------|
| Time (h)                  | 2     |
| Concentration of Fe (ppm) | 0.003 |

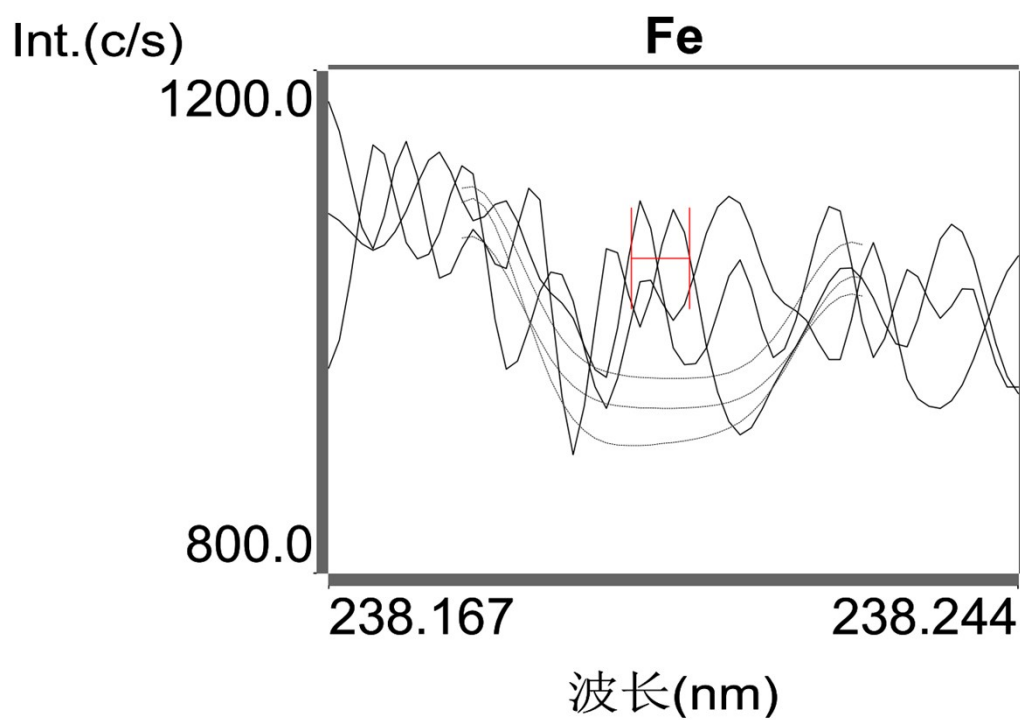

The ICP-OES measurement is used to detect the concentration of Fe in the electrolyte after 2 h electrolysis. According to the ICP-OES analysis results, the concentration of Fe in the electrolyte is 0.003 ppm after 2 h electrolysis. This result demonstrates the high structural stability of the catalyst during the electrochemical process.

**Table S1** Summary of the representative reports on electrocatalytic N<sub>2</sub> fixation at ambient conditions.

| Catalysts                                                       | Electrolytes                              | NH <sub>3</sub> yield                                                                                                           | Faradaic efficiency | References       |
|-----------------------------------------------------------------|-------------------------------------------|---------------------------------------------------------------------------------------------------------------------------------|---------------------|------------------|
| <b>Fe-MnO<sub>2</sub></b>                                       | <b>0.1 M Na<sub>2</sub>SO<sub>4</sub></b> | <b>39.2 μg h<sup>-1</sup> mg<sub>cat.</sub><sup>-1</sup></b><br><b>2.56×10<sup>-10</sup> mol s<sup>-1</sup> cm<sup>-2</sup></b> | <b>16.8%</b>        | <b>This work</b> |
| Mn <sub>3</sub> O <sub>4</sub>                                  | 0.1 M Na <sub>2</sub> SO <sub>4</sub>     | 11.6 μg h <sup>-1</sup> mg <sub>cat.</sub> <sup>-1</sup>                                                                        | 3%                  | 6                |
| MnO                                                             | 0.1 M Na <sub>2</sub> SO <sub>4</sub>     | 7.92 μg h <sup>-1</sup> mg <sub>cat.</sub> <sup>-1</sup>                                                                        | 8.02%               | 7                |
| MnO <sub>x</sub>                                                | 0.1 M Na <sub>2</sub> SO <sub>4</sub>     | 1.63×10 <sup>-10</sup> mol s <sup>-1</sup> cm <sup>-2</sup>                                                                     | 11.4%               | 8                |
| Mn <sub>3</sub> O <sub>4</sub> @rGO                             | 0.1 M Na <sub>2</sub> SO <sub>4</sub>     | 17.4 μg h <sup>-1</sup> mg <sub>cat.</sub> <sup>-1</sup>                                                                        | 3.52%               | 9                |
| MnO <sub>2</sub> -Ti <sub>3</sub> C <sub>2</sub> T <sub>x</sub> | 0.1 M HCl                                 | 34.12 μg h <sup>-1</sup> mg <sub>cat.</sub> <sup>-1</sup>                                                                       | 11.39%              | 10               |
| LiMnO <sub>4</sub>                                              | 0.1 M HCl                                 | 15.83 μg h <sup>-1</sup> mg <sub>cat.</sub> <sup>-1</sup>                                                                       | 7.44%               | 11               |
| NaOH-Ti <sub>3</sub> C <sub>2</sub> T <sub>x</sub>              | 0.1 M HCl                                 | 36.9 μg h <sup>-1</sup> mg <sub>cat.</sub> <sup>-1</sup>                                                                        | 9.1%                | 12               |
| WO <sub>3-x</sub> (V <sub>o</sub> ) <sub>2</sub>                | 0.1 M HCl                                 | 4.2 μg h <sup>-1</sup> mg <sub>cat.</sub> <sup>-1</sup>                                                                         | 6.8%                | 13               |
| WO <sub>3</sub>                                                 | 0.1 M HCl                                 | 17.28 μg h <sup>-1</sup> mg <sub>cat.</sub> <sup>-1</sup>                                                                       | 7.0%                | 14               |
| Au Nanorod                                                      | 0.1 M KOH                                 | 6.042 μg h <sup>-1</sup> mg <sub>cat.</sub> <sup>-1</sup>                                                                       | 3.879%              | 15               |
| Rh nanosheets                                                   | 0.1 M KOH                                 | 23.88 μg h <sup>-1</sup> mg <sub>cat.</sub> <sup>-1</sup>                                                                       | 0.217%              | 16               |
| Mo <sub>2</sub> C                                               | 0.5 M Li <sub>2</sub> SO <sub>4</sub>     | 11.3 μg h <sup>-1</sup> mg <sub>cat.</sub> <sup>-1</sup>                                                                        | 7.8%                | 17               |
| Cu/AC-S                                                         | 0.1 M Na <sub>2</sub> SO <sub>4</sub>     | 9.7μg h <sup>-1</sup> mg <sub>cat.</sub> <sup>-1</sup>                                                                          | 15.9%               | 18               |
| BiVO <sub>4</sub>                                               | 0.2 M Na <sub>2</sub> SO <sub>4</sub>     | 8.6 μg h <sup>-1</sup> mg <sub>cat.</sub> <sup>-1</sup>                                                                         | 10.04%              | 19               |
| Bi NS                                                           | 0.1 M Na <sub>2</sub> SO <sub>4</sub>     | 13.23 μg h <sup>-1</sup> mg <sub>cat.</sub> <sup>-1</sup>                                                                       | 10.49%              | 20               |
| Defect-rich MoS <sub>2</sub>                                    | 0.1 M Na <sub>2</sub> SO <sub>4</sub>     | 2.93 μg h <sup>-1</sup> mg <sub>cat.</sub> <sup>-1</sup>                                                                        | 8.34%               | 21               |
| FeN <sub>4</sub>                                                | 0.1 M Na <sub>2</sub> SO <sub>4</sub>     | 10.25 μg h <sup>-1</sup> mg <sub>cat.</sub> <sup>-1</sup>                                                                       | 14.17               | 22               |

## References

1. L. Xia, X. Wu, Y. Wang, Z. Niu, Q. Liu, T. Li, X. Shi, A. M. Asiri and X. Sun, *Small Methods*, 2019, **3**, 1800251-1800256.
2. P. Li, J. Wang, H. Chen, X. Sun, J. You, S. Liu, Y. Zhang, M. Liu, X. Niu and Y. Luo, *J. Mater. Chem. A*, 2019, **7**, 12446-12450.
3. B. Delley, *J. Chem. Phys.*, 1990, **92**, 508-517.
4. J. P. Perdew, K. Burke and M. Ernzerhof, *Phys. Rev. Lett.*, 1996, **77**, 3865.
5. B. Delley, *J. Chem. Phys.*, 2000, **113**, 7756-7764.
6. X. Wu, L. Xia, Y. Wang, W. Lu, Q. Liu, X. Shi and X. Sun, *Small*, 2018, **14**.
7. Z. Wang, F. Gong, L. Zhang, R. Wang, L. Ji, Q. Liu, Y. Luo, H. Guo, Y. Li and P. Gao, *Adv. Sci.*, 2019, **6**, 1801182-1801190.
8. L. Zhang, X. Y. Xie, H. Wang, L. Ji, Y. Zhang, H. Chen, T. Li, Y. Luo, G. Cui and X. Sun, *Chem. Commun.*, 2019, **55**, 4627-4630.
9. H. Huang, F. Gong, Y. Wang, H. Wang, X. Wu, W. Lu, R. Zhao, H. Chen, X. Shi, A. M. Asiri, T. Li, Q. Liu and X. Sun, *Nano Research*, 2019, **12**, 1093-1098.
10. W. Kong, F. Gong, Q. Zhou, G. Yu, L. Ji, X. Sun, A. M. Asiri, T. Wang, Y. Luo and Y. Xu, *J. Mater. Chem. A*, 2019.
11. C. Li, J. Yu, L. Yang, J. Zhao, W. Kong, T. Wang, A. M. Asiri, Q. Li and X. Sun, *Inorg. Chem.*, 2019, **58**, 9597-9601.
12. T. Li, L. Yao, Q. Liu, J. Gu, R. Luo, J. Li, X. Yan, W. Wang, P. Liu and B. Chen, *Angew. Chem., Int. Ed.*, 2018, **7**, 14462-14465.
13. Z. Sun, R. Huo, C. Choi, S. Hong, T.-S. Wu, J. Qiu, C. Yan, Z. Han, Y. Liu and Y.-L. Soo, *Nano Energy*, 2019, 869-875.
14. W. Kong, R. Zhang, X. Zhang, L. Ji, G. Yu, T. Wang, Y. Luo, X. Shi, Y. Xu and X. Sun, *Nanoscale*, 2019, 1-4.
15. D. Bao, Q. Zhang, F. L. Meng, H. X. Zhong, M. M. Shi, Y. Zhang, J. M. Yan, Q. Jiang and X. B. Zhang, *Adv. Mater.*, 2017, **29**, 1604799-1604804.
16. H.-M. Liu, S.-H. Han, Y. Zhao, Y.-Y. Zhu, X.-L. Tian, J.-H. Zeng, J.-X. Jiang, B. Y. Xia and Y. Chen, *J. Mater. Chem. A*, 2018, **6**, 3211-3217.
17. H. Cheng, L. X. Ding, G. F. Chen, L. Zhang, J. Xue and H. Wang, *Adv. Mater.*, 2018, **30**, 1803694-1803671.
18. S. Zhang, W. Li, Y. Liu, J. Wang and H. Zhang, *Inorg. Chem. Front.*, 2019, **6**, 2832-2836.
19. J. X. Yao, D. Bao, Q. Zhang, M. M. Shi, Y. Wang, R. Gao, J. M. Yan and Q. Jiang, *Small Methods*, 2018, **6**, 1800333-1800342.
20. L. Li, C. Tang, B. Xia, H. Jin, Y. Zheng and S.-Z. Qiao, *ACS Catal.*, 2019, **9**, 2902-2908.
21. J. Xie, H. Zhang, S. Li, R. Wang, X. Sun, M. Zhou, J. Zhou, X. W. Lou and Y. Xie, *Adv. Mater.*, 2013, **25**, 5807-5813.
22. C. He, Z.-Y. Wu, L. Zhao, M. Ming, Y. Zhang, Y. Yi and J.-S. Hu, *ACS Catal.*, 2019, **9**, 7311-7317.
